# Supplementary material for: Rapidly recovering hydrogel scaffolds from self-assembling diblock copolypeptide amphiphiles
Source: Springer Nature journal article supplement (doi:10.1038/417424a), 2002-05-01
Supplement: 41586_2002_BF417424a_MOESM1_ESM.pdf [file 41586_2002_BF417424a_MOESM1_ESM.pdf]

**Nowak *et al.* Supplementary Information**

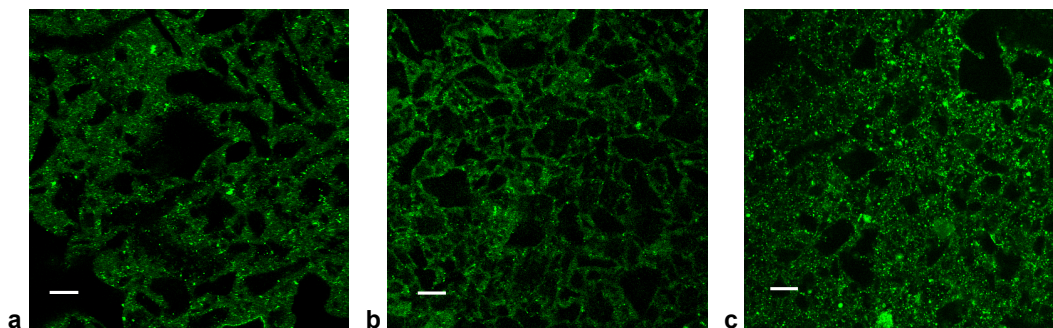

**Figure S-1** Structure of  $K_{160}L_{40}$  solutions at different concentrations as observed with Laser Scanning Confocal Microscopy: **a**, below gelation (0.125 wt%), **b**, near gelation point (0.25 wt%), and **c**, strong gel (1.0 wt%); scale bars denote 20  $\mu\text{m}$  and rheology of samples is given in Fig. 2a.
