# Supplementary material for: Rapidly recovering hydrogel scaffolds from self-assembling diblock copolypeptide amphiphiles
Source: Springer Nature journal article supplement (doi:10.1038/417424a), 2002-05-01
Supplement: 41586_2002_BF417424a_MOESM2_ESM.pdf [file 41586_2002_BF417424a_MOESM2_ESM.pdf]

**Nowak *et al.* Supplementary Information**

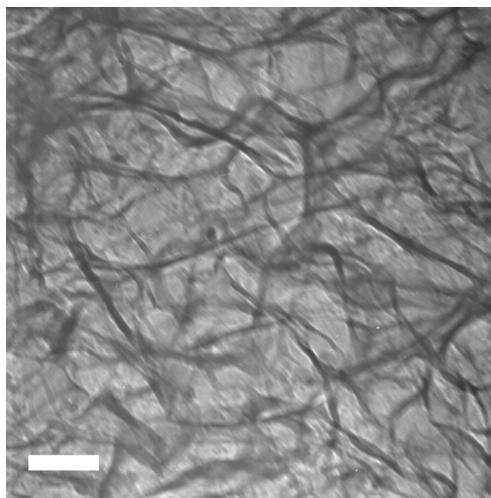

**Figure S-2** Cryogenic Transmission Electron Microscopy (CTEM) image of 1.0 wt%  $K_{160}L_{40}$  gel (scale bar = 100 nm).
