# Supplementary material for: Rapidly recovering hydrogel scaffolds from self-assembling diblock copolypeptide amphiphiles
Source: Springer Nature journal article supplement (doi:10.1038/417424a), 2002-05-01
Supplement: 41586_2002_BF417424a_MOESM3_ESM.pdf [file 41586_2002_BF417424a_MOESM3_ESM.pdf]

**Nowak et al. Supplementary Information**

| <b>Sample</b>                          | <b>M<sub>n</sub></b> | <b>M<sub>n</sub> (calc)</b> | <b>X<sub>n</sub></b> | <b>M<sub>w</sub>/M<sub>n</sub></b> | <b>%K or E</b> | <b>%L or V</b> |
|----------------------------------------|----------------------|-----------------------------|----------------------|------------------------------------|----------------|----------------|
| K <sub>160</sub> L <sub>40</sub>       | 47,800               | 46,612                      | 205                  | 1.28                               | 82.9           | 17.1           |
| K <sub>180</sub> L <sub>20</sub>       | 50,300               | 49,534                      | 204                  | 1.20                               | 91.5           | 8.5            |
| K <sub>160</sub> (rac-L) <sub>40</sub> | 48,100               | 46,612                      | 206                  | 1.15                               | 81.7           | 18.3           |
| K <sub>90</sub> L <sub>10</sub>        | 22,900               | 24,767                      | 92                   | 1.12                               | 92.4           | 7.6            |
| K <sub>160</sub> V <sub>40</sub>       | 48,400               | 45,930                      | 211                  | 1.30                               | 81.9           | 18.1           |
| K <sub>180</sub> V <sub>20</sub>       | 52,100               | 49,193                      | 212                  | 1.21                               | 90.8           | 9.2            |
| E <sub>160</sub> L <sub>40</sub>       | 38,200               | 39,732                      | 192                  | 1.29                               | 79.4           | 20.6           |

**Table S-1** Detailed compositional and molecular weight data for the copolypeptides in this study. **M<sub>n</sub>**: number average molecular weights of side-chain protected copolymers as determined by size exclusion chromatography (SEC). **M<sub>n</sub> (calc)**: predicted values. **X<sub>n</sub>**: numbers of residues in the copolymer chains (derived from M<sub>n</sub>). **M<sub>w</sub>/M<sub>n</sub>**: CLD or polydispersity index values for the copolymer samples, as determined using SEC. Partial aggregation in the SEC eluant (DMF) likely resulted in the higher values found for the 20 mol% hydrophobe samples. **% K or E** and **% L or V**: amino acid compositions (mol %) as determined using <sup>1</sup>H NMR spectroscopy in deuterated trifluoroacetic acid.
